# Supplementary material for: Vector Competence of Culicoides sonorensis (Diptera: Ceratopogonidae) for Epizootic Hemorrhagic Disease Virus Serotype 2 Strains from Canada and Florida
Source: MDPI journal article supplement (doi:10.3390/v11040367), 2019-04-22

**Supplementary File 1:** Standard viral curves for the Can-Alberta strain (a) and Florida strain (b) of EHDV-2 used to experimentally infect colony *Culicoides sonorensis*. Viral curves were generated using serially diluted virus samples for each strain. Plaque assays were run to determine PFU/mL and compared to Cq values generated using qRT-PCR. Both viral curves were generated using Bio-Rad CFX Manager 3.1 software.

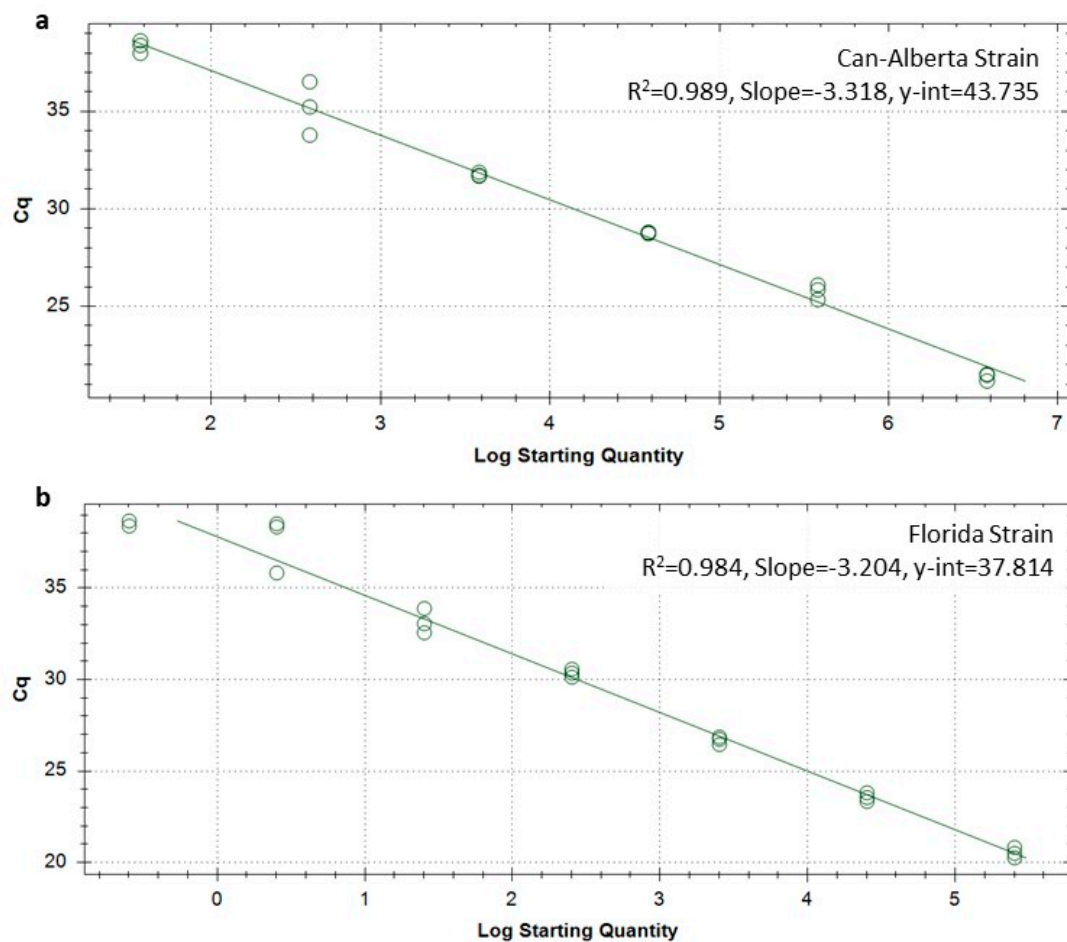

Supplement: s1 [file s1]
